# Supplementary material for: Measurement Report: Effects of transition metal ions on the optical properties of humic-like substances revealing structural preference
Source: Copernicus journal article supplement (doi:10.5194/egusphere-2023-2632), 2024-01-05
Supplement: Supplementary file 1 [file egusphere-2023-2632-supplement.pdf]

## Supporting Information

### Effects of Transition Metal ions (TMs) on the optical properties of Humic-like substances (HULIS) revealing structural preference

Juanjuan Qin<sup>1,2</sup>, Leiming Zhang<sup>3</sup>, Yuanyuan Qin<sup>1</sup>, Shaoxuan Shi<sup>1</sup>, Jingnan Li<sup>1</sup>, Zhao Shu<sup>1</sup>, Yuwei Gao<sup>1</sup>,  
5 Ting Qi<sup>4</sup>, Jihua Tan<sup>1\*</sup>, Xinming Wang<sup>2\*</sup>

<sup>1</sup>College of Resources and Environment, University of Chinese Academy of Sciences, Beijing 100049, China

<sup>2</sup>Guangzhou Institute of Geochemistry, Chinese Academy of Sciences, Guangzhou 510640, China

<sup>3</sup>Air Quality Research Division, Science & Technology Branch, Environment and Climate Change Canada, Toronto, Canada

<sup>4</sup>College of Resources and Environment, University of Chinese Academy of Sciences, Beijing 100049, China

10 *Correspondence to:* Jihua Tan (tanjh@ucas.ac.cn); Xinming Wang (wangxm@gig.ac.cn)

#### Summary of figures and tables

**Figures S1** The ratio spectra of mass absorption efficiency (MAE) for winter humic-like substances (HULIS) with addition of four transition metal ions under acidic, weakly acidic and neutral environment.

[Page S2](#)

15 **Figures S2** The ratio spectra of MAE for summer HULIS with addition of four transition metal ions under acidic, weakly acidic and neutral environment.

[Page S2](#)

**Figures S3** The excitation-emission matrix spectra of winter HULIS with addition of 0-500  $\mu\text{M}$   $\text{Cu}^{2+}$  under three acidity conditions.

20 [Page S3](#)

**Figures S4** The excitation-emission matrix spectra of summer HULIS with addition of 0-500  $\mu\text{M}$   $\text{Cu}^{2+}$  under three acidity conditions.

[Page S3](#)

**Tables S1** The Stern-volmer results for the PARAFAC results of TMs and winter HULIS.

25 [Page S4](#)

**Tables S2** The Stern-volmer results for the PARAFAC results of TMs and summer HULIS.

[Page S4](#)

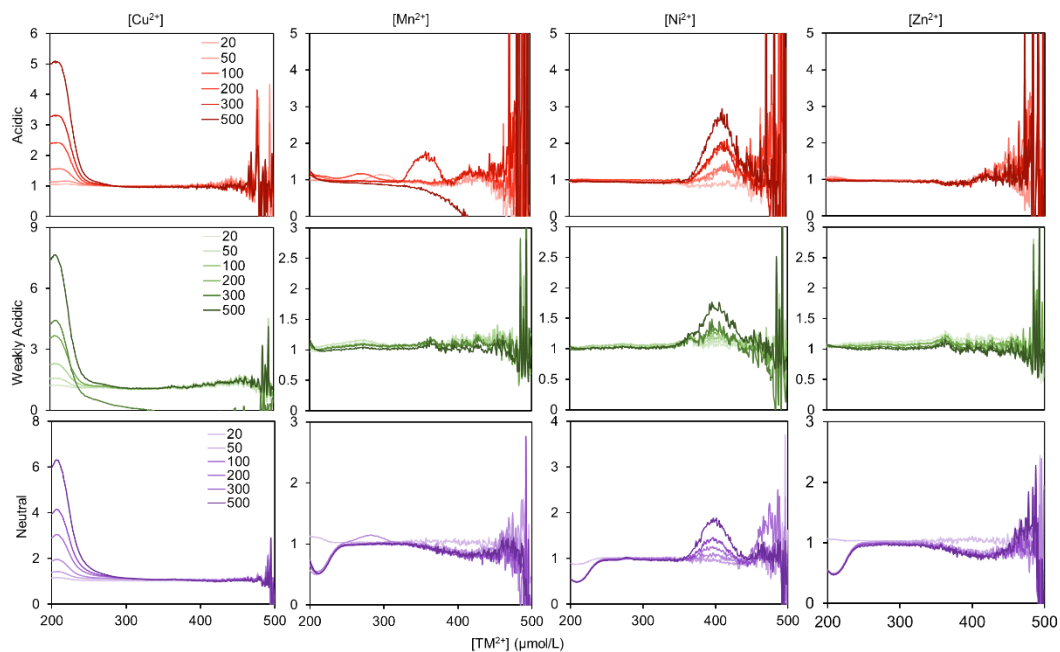

30 **Figures S3** The ratio spectra of mass absorption efficiency (MAE) for winter humic-like substances (HULIS) with addition of four transition metal ions under acidic, weakly acidic and neutral conditions.

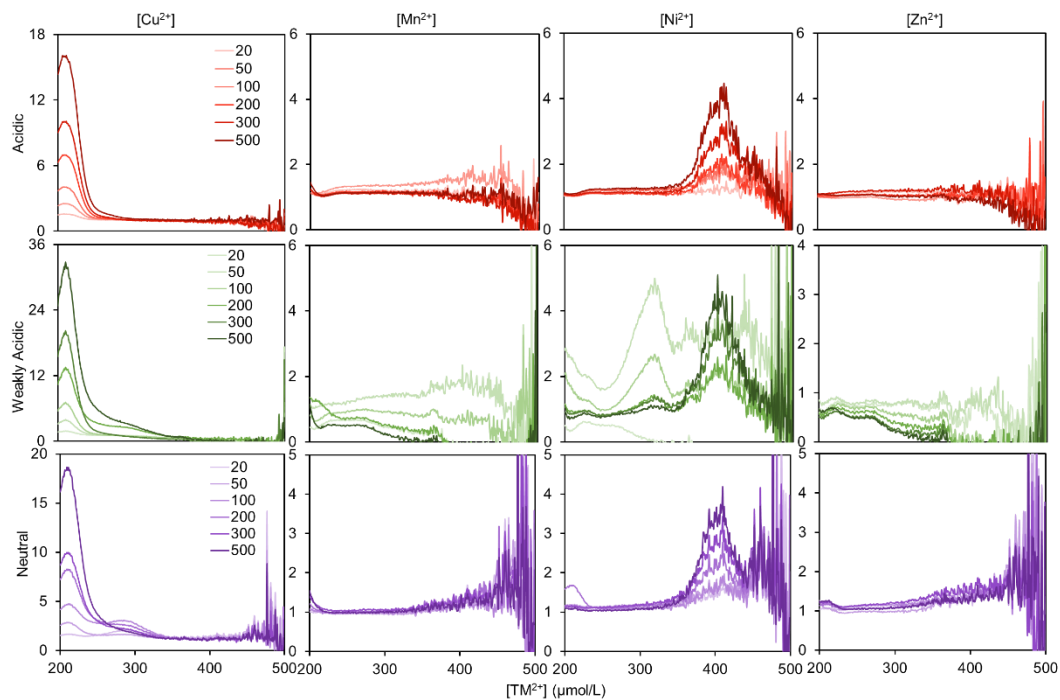

**Figures S4** The ratio spectra of MAE for summer HULIS with addition of four transition metal ions under acidic, weakly acidic and neutral conditions.

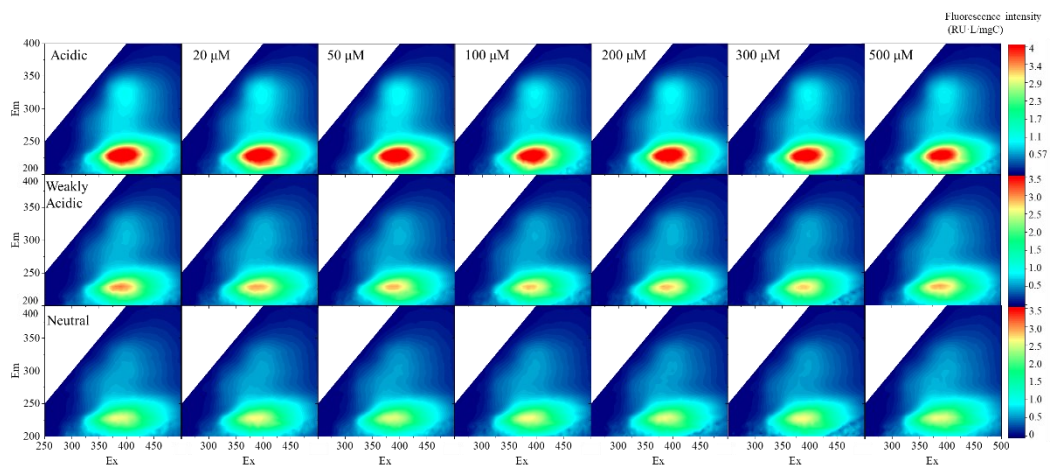

35

**Figures S3** The excitation-emission matrix spectra of winter HULIS with addition of 0-500  $\mu\text{M}$   $\text{Cu}^{2+}$  under three acidity conditions.

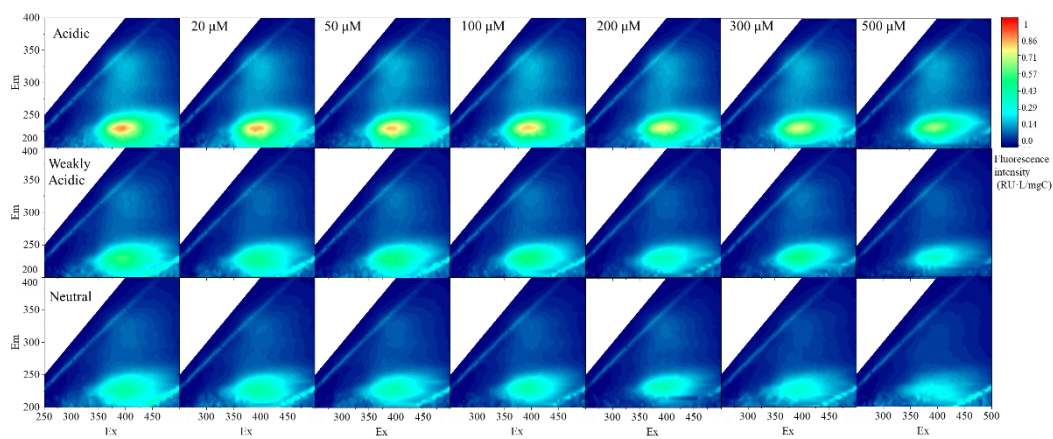

**Figures S4** The excitation-emission matrix spectra of summer HULIS with addition of 0-500  $\mu\text{M}$   $\text{Cu}^{2+}$  under three acidity conditions.

40

**Tables S3 The Stern-volmer results for the PARAFAC results of TMs and winter HULIS.**

| Acidity       | Components | Cu <sup>2+</sup>          |                       | Mn <sup>2+</sup>          |                       | Ni <sup>2+</sup>          |                       | Zn <sup>2+</sup>          |                       |
|---------------|------------|---------------------------|-----------------------|---------------------------|-----------------------|---------------------------|-----------------------|---------------------------|-----------------------|
|               |            | <i>k</i> ·10 <sup>3</sup> | <i>R</i> <sup>2</sup> |
| Acidic        | C1         | 0.60                      | 0.98                  | 0.08                      | 0.94                  | 0.09                      | 0.97                  | 0.10                      | 0.87                  |
|               | C2         | -0.04                     | 0.11                  | 0.10                      | 0.72                  | 0.07                      | 0.63                  | 0.04                      | 0.47                  |
|               | C3         | -0.30                     | 0.99                  | 0.09                      | 0.88                  | 0.10                      | 0.97                  | 0.03                      | 0.52                  |
|               | C4         | 1.90                      | 0.97                  | 0.10                      | 0.43                  | 0.10                      | 0.33                  | 0.40                      | 0.69                  |
| Weakly Acidic | C1         | 0.04                      | 0.12                  | -0.05                     | 0.15                  | 0.03                      | 0.05                  | 0.01                      | 0.02                  |
|               | C2         | 0.20                      | 0.84                  | 0.20                      | 0.93                  | 0.10                      | 0.98                  | 0.05                      | 0.73                  |
|               | C3         | 0.30                      | 0.83                  | 0.10                      | 0.96                  | 0.20                      | 0.98                  | 0.07                      | 0.68                  |
|               | C4         | 0.20                      | 0.27                  | 0.03                      | 0.05                  | 0.09                      | 0.48                  | 0.10                      | 0.64                  |
| Neutral       | C1         | 0.50                      | 0.99                  | 0.10                      | 0.58                  | 0.20                      | 0.48                  | 0.10                      | 0.64                  |
|               | C2         | 0.30                      | 0.94                  | 0.08                      | 0.55                  | 0.09                      | 0.55                  | 0.08                      | 0.36                  |
|               | C3         | 0.01                      | 0.01                  | 0.10                      | 0.73                  | 0.20                      | 0.88                  | 0.06                      | 0.44                  |
|               | C4         | 1.50                      | 0.97                  | 0.10                      | 0.62                  | 0.20                      | 0.57                  | 0.09                      | 0.76                  |

**Tables S4 The Stern-volmer results for the PARAFAC results of TMs and summer HULIS.**

| Acidity       | Components | Cu <sup>2+</sup>          |                       | Mn <sup>2+</sup>          |                       | Ni <sup>2+</sup>          |                       | Zn <sup>2+</sup>          |                       |
|---------------|------------|---------------------------|-----------------------|---------------------------|-----------------------|---------------------------|-----------------------|---------------------------|-----------------------|
|               |            | <i>k</i> ·10 <sup>3</sup> | <i>R</i> <sup>2</sup> |
| Acidic        | C1         | 0.60                      | 0.98                  | 0.10                      | 0.38                  | 0.01                      | 0.01                  | -0.20                     | 0.09                  |
|               | C2         | 1.30                      | 0.98                  | 0.20                      | 0.18                  | 0.50                      | 0.16                  | -0.40                     | 0.58                  |
|               | C3         | 0.70                      | 0.99                  | 0.10                      | 0.73                  | 0.09                      | 0.15                  | -0.06                     | 0.01                  |
|               | C4         | -0.90                     | 0.95                  | 0.05                      | 0.00                  | 1.60                      | 0.81                  | 0.10                      | 0.04                  |
| Weakly Acidic | C1         | 1.00                      | 0.72                  | 0.10                      | 0.01                  | -0.8                      | 0.58                  | -0.40                     | 0.07                  |
|               | C2         | 1.20                      | 0.92                  | 0.06                      | 0.13                  | 0.05                      | 0.03                  | -0.10                     | 0.65                  |
|               | C3         | 0.60                      | 0.73                  | 0.10                      | 0.04                  | -0.10                     | 0.29                  | -0.20                     | 0.11                  |
|               | C4         | -0.30                     | 0.56                  | 0.05                      | 0.08                  | 0.20                      | 0.71                  | 0.04                      | 0.23                  |
| Neutral       | C1         | 0.40                      | 0.33                  | 0.03                      | 0.01                  | -0.10                     | 0.05                  | -0.60                     | 0.12                  |
|               | C2         | 1.20                      | 0.95                  | 0.10                      | 0.49                  | -0.01                     | 0.01                  | 0.20                      | 0.19                  |
|               | C3         | 0.30                      | 0.61                  | -0.02                     | 0.01                  | 0.20                      | 0.68                  | -0.40                     | 0.39                  |
|               | C4         | -0.50                     | 0.97                  | -0.05                     | 0.00                  | 0.10                      | 0.43                  | -0.20                     | 0.36                  |
